# Supplementary material for: METTL3-mediated m6A modification of HMGA2 mRNA promotes subretinal fibrosis and epithelial–mesenchymal transition
Source: PubMed Central journal article supplement (PMC10603769; doi:10.1093/jmcb/mjad005), 2023-03-21
Supplement: mjad005_supplemental_file.pdf [file mjad005_supplemental_file.pdf]

## Supplementary material

### **METTL3-mediated m6A modification of HMGA2 mRNA promotes subretinal fibrosis and epithelial–mesenchymal transition**

Yuwei Wang<sup>1,2,†</sup>, Yuhong Chen<sup>1,2,†</sup>, Jian Liang<sup>2,†</sup>, Mei Jiang<sup>1,2</sup>, Ting Zhang<sup>1,2</sup>, Xiaoling Wan<sup>1,2</sup>, Jiahui Wu<sup>1,2</sup>, Xiaomeng Li<sup>1,2</sup>, Jieqiong Chen<sup>1,2</sup>, Junran Sun<sup>1,2</sup>, Yifan Hu<sup>1,2</sup>, Peirong Huang<sup>1,2</sup>, Jingyang Feng<sup>1,2</sup>, Te Liu<sup>5,\*</sup>, and Xiaodong Sun<sup>1,2,3,4,\*</sup>

<sup>1</sup> Department of Ophthalmology, Shanghai General Hospital, Shanghai Jiao Tong University School of Medicine, Shanghai 200080, China

<sup>2</sup> Shanghai Key Laboratory of Ocular Fundus Diseases, Shanghai 200080, China

<sup>3</sup> National Clinical Research Center for Eye Diseases, Shanghai 200080, China

<sup>4</sup> Shanghai Engineering Center for Visual Science and Photomedicine, Shanghai 200080, China

<sup>5</sup> Shanghai Geriatric Institute of Chinese Medicine, Shanghai University of Traditional Chinese Medicine, Shanghai 200031, China

<sup>†</sup> These authors contributed equally to this work.

\* Correspondence to: Xiaodong Sun, Department of Ophthalmology, Shanghai General Hospital, Shanghai Jiao Tong University School of Medicine, 100 Haining Rd, Shanghai 200080, China; Tel: +86-21-63075768; E-mail: [xdsun@sjtu.edu.cn](mailto:xdsun@sjtu.edu.cn); Te Liu, Shanghai Geriatric Institute of Chinese Medicine, Shanghai University of Traditional Chinese Medicine, 365 South Xiangyang Rd, Shanghai 200031, China; Tel: +86-13918909976; E-mail: [liute1979@shutcm.edu.cn](mailto:liute1979@shutcm.edu.cn)

## Supplementary Figures

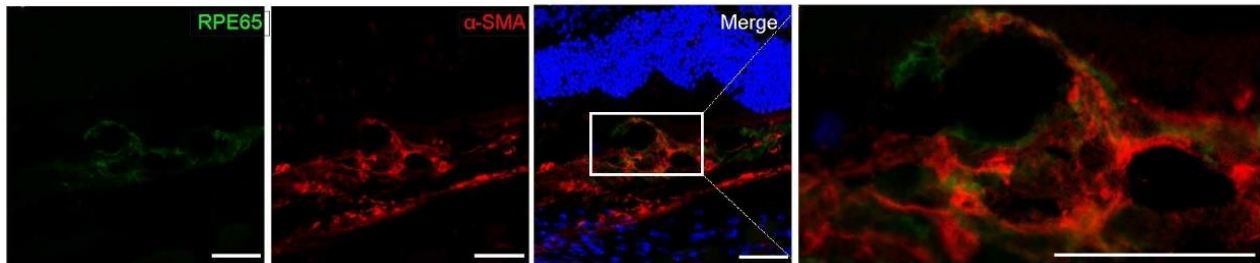

**Supplementary Figure S1** RPE65<sup>+</sup>α-SMA<sup>+</sup> double-positive cells were detected in the subretinal region. Scale bar, 25 μm.

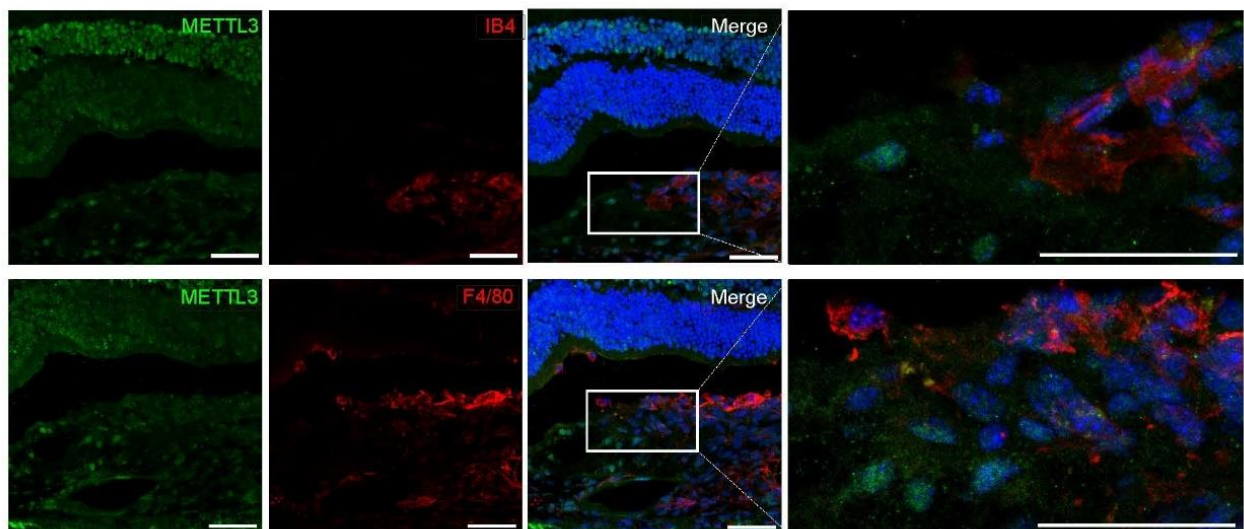

**Supplementary Figure S2** Immunofluorescence co-staining showed that increased METTL3 was not located in the F4/80-positive or isolectin B4 (IB4)-positive cells in the subretinal region. Scale bar, 25 μm.

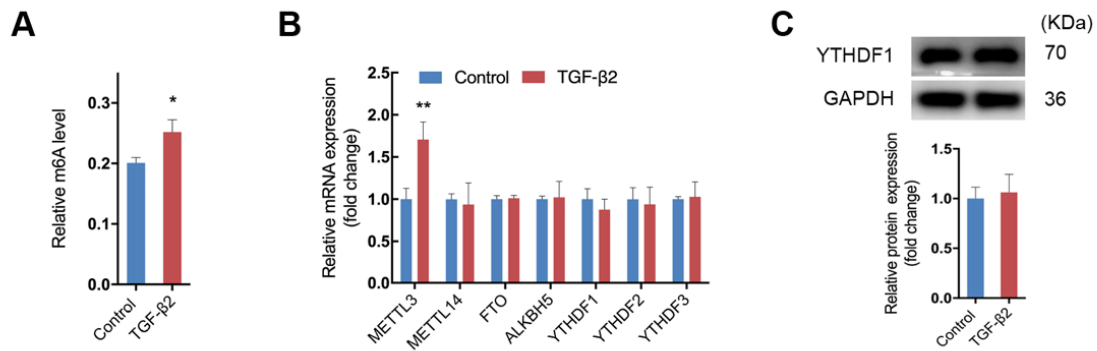

**Supplementary Figure S3** Total m6A levels and expression of m6A RNA methylation regulators were measured in RPE cells undergoing EMT. **(A)** Total m6A levels of RPE cells with and without TGF-β2 treatment. **(B)** The mRNA levels of several m6A regulators were measured by qRT-PCR. **(C)** A western blot analysis of YTHDF1 in RPE cells. Data present mean  $\pm$  SD of three independent experiments. Student's *t*-test for two independent groups, \* $P < 0.05$ , \*\* $P < 0.01$ .

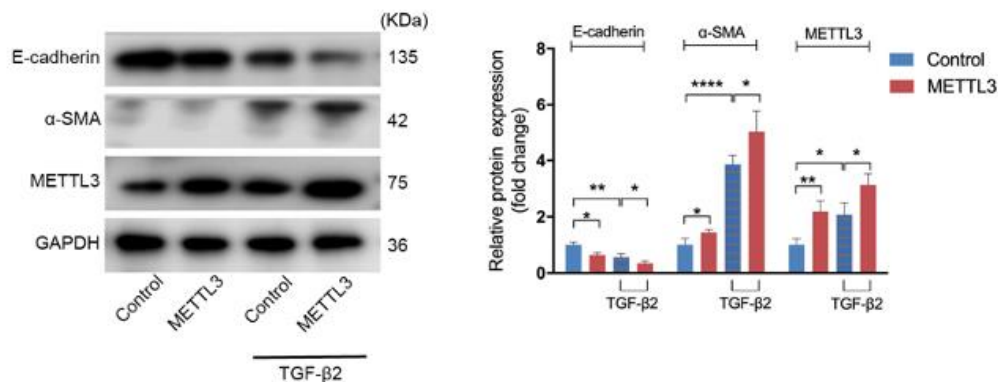

**Supplementary Figure S4** Western blot analysis of E-cadherin and  $\alpha$ -SMA was performed to determine the effect of METTL3 overexpression on the EMT of RPE cells. Data present mean  $\pm$  SD of three independent experiments. Student's *t*-test for two independent groups, \* $P < 0.05$ , \*\* $P < 0.01$ , \*\*\*\* $P < 0.0001$ .

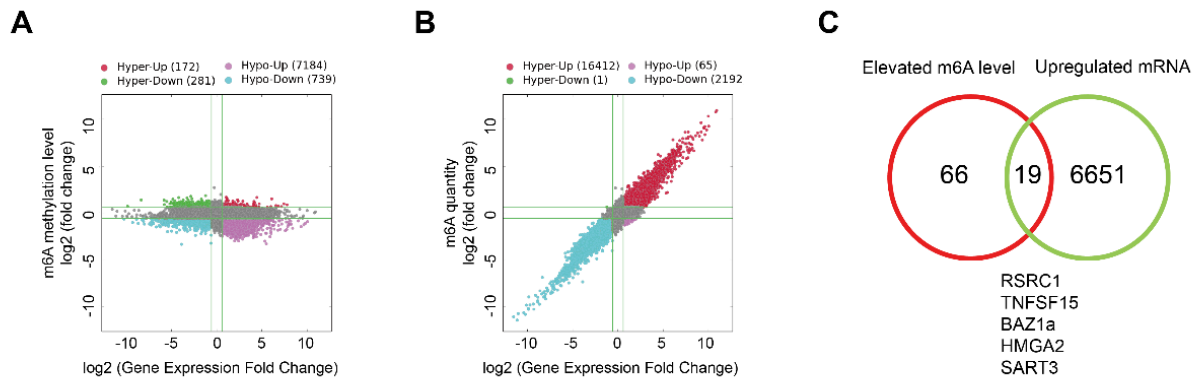

**Supplementary Figure S5** Widespread m6A modification of primary mouse RPE cells undergoing EMT is revealed by m6A epitranscriptomic microarray. **(A)** A combined analysis of altered gene expression and m6A methylation level. **(B)** A combined analysis of altered gene expression and m6A quantity. **(C)** Overlapping of genes with elevated m6A level and mRNA level (fold change > 2).

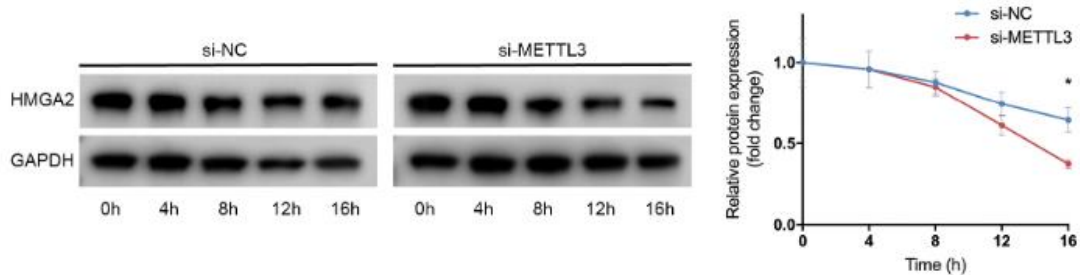

**Supplementary Figure S6** Western blot analysis showed a faster decline in HMGGA2 protein with METTL3 knockdown. Data present mean  $\pm$ SD of three independent experiments. Repeated measures two-way ANOVA tests,  $*P < 0.05$ .

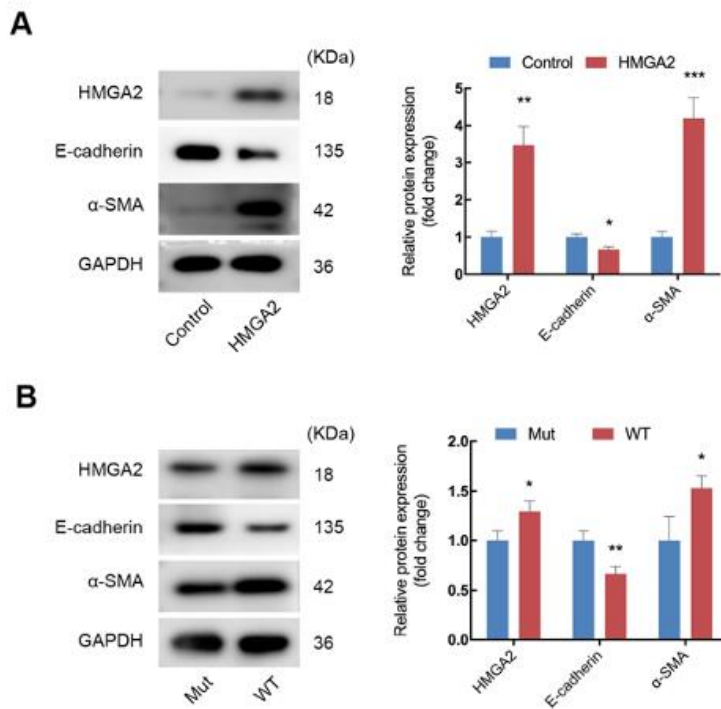

**Supplementary Figure S7** The role of HMGA2 in the EMT of RPE cells. **(A)** After METTL3 inhibition, overexpression of HMGA2 promoted EMT of RPE cells. **(B)** WT or mutant HMGA2 expression plasmids were transfected into HMGA2 pre-knocked cells and the EMT was evaluated at the protein levels. Data present mean  $\pm$  SD of three independent experiments. Student's *t*-test for two independent groups, \* $P < 0.05$ , \*\* $P < 0.01$ , \*\*\* $P < 0.001$ .

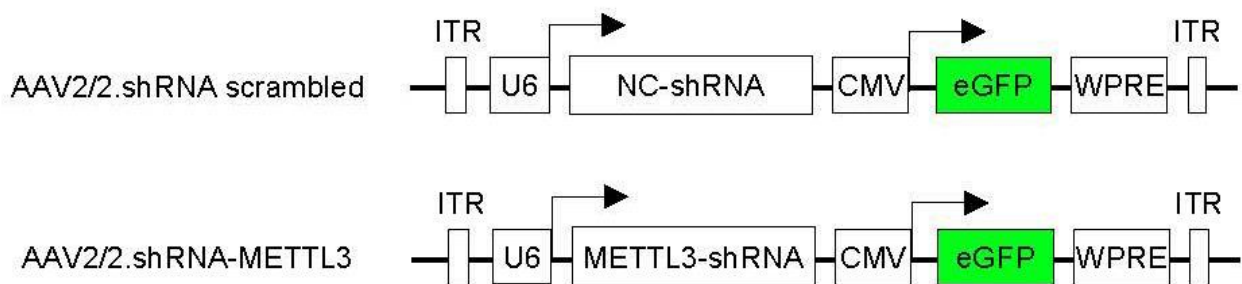

**Supplementary Figure S8** Schematic representation of AAV2/2.shRNA scramble and AAV2/2.shRNA-METTL3 used to transfect RPE cells through subretinal injection.

## Supplementary Tables

**Supplementary Table S1 Sequences of siRNAs targeting METTL3 and HMGA2.**

| Gene                                 | Sequence              |
|--------------------------------------|-----------------------|
| METTL3                               | CUGCACUUCAGACGAAUUATT |
| METTL3 (better knockdown efficiency) | GCUACCGUAUGGGACAUUATT |
| HMGA2                                | GCCUUGAAGCAUCGGAGAUTT |

**Supplementary Table S2 Quantitative RT-PCR primers.**

| Gene                   | Forward primer          | Reverse primer          |
|------------------------|-------------------------|-------------------------|
| CDH1                   | CAGGTCTCCTCATGGCTTTGC   | CTTCCGAAAAGAAGGCTGTCC   |
| CDH2                   | AGCGCAGTCTTACCGAAGG     | TCGCTGCTTTCATACTGAACTTT |
| ACTA2                  | GTCCCAGACATCAGGGAGTAA   | TCGGATACTTCAGCGTCAGGA   |
| Fibronectin            | ATGTGGACCCCTCCTGATAGT   | GCCCAGTGATTTTCAGCAAAGG  |
| METTL3                 | GACTCTGGGCACTTGGAT      | GTTGTGCTGGGCTTAGGG      |
| METTL14                | GAACCGTGAAGCGAAGCA      | AGCCTGGCCTGATAGTGC      |
| FTO                    | AGGATGAAAGTGAGGACGAG    | TGGTGAAGAGGGATTGTTA     |
| ALKBH5                 | TCAGCGACTCGGCACTTT      | TTCATCAGCAGCATACCCAC    |
| YTHDF1                 | CCCATCCCGTATCTCACT      | CCTGTGCTGGTAAATGTTG     |
| YTHDF2                 | GGTGGTGATGGTCTTCGCATAC  | TTGGAGGTGCTGGAAAGTTCAG  |
| YTHDF3                 | ATGAGAGAATGGGTCCTGGTT   | GCCCAGAATCTCGTGACTCTTC  |
| HMGA2                  | TGGGAGGAGCGAAATCTAAA    | TCCCTGGAGAAGAGCTACG     |
| SNAIL                  | CACACGCTGCCTTGTGTCT     | GGTCAGCAAAGCACGGTT      |
| SLUG                   | TGGTCAAGAAACATTTCAACGCC | GGTGAGGATCTCTGGTTTTGGTA |
| TWIST1                 | GGACAAGCTGAGCAAGATTCA   | CGGAGAAGGCGTAGCTGAG     |
| TWIST2                 | CGCTACAGCAAGAAATCGAGC   | GCTGAGCTTGTCAGAGGGG     |
| ZEB1                   | GCTGGCAAGACAACGTGAAAG   | GCCTCAGGATAAATGACGGC    |
| ZEB2                   | ATTGCACATCAGACTTTGAGGAA | ATAATGGCCGTGTCGCTTCG    |
| HMGA2 (for meRIP-qPCR) | TGTGCCCTCTGACTTCGTTC    | CCCACAGAGGCTGTTA        |
